# Supplementary material for: Differential impact of the COVID-19 pandemic on primary care utilization related to common mental disorders in four European countries: A retrospective observational study
Source: PubMed Central journal article supplement (PMC9868724; doi:10.3389/fpsyt.2022.1045325), 2023-01-09
Supplement: Image_1.pdf [file Image_1.pdf]

## Anxiety patients

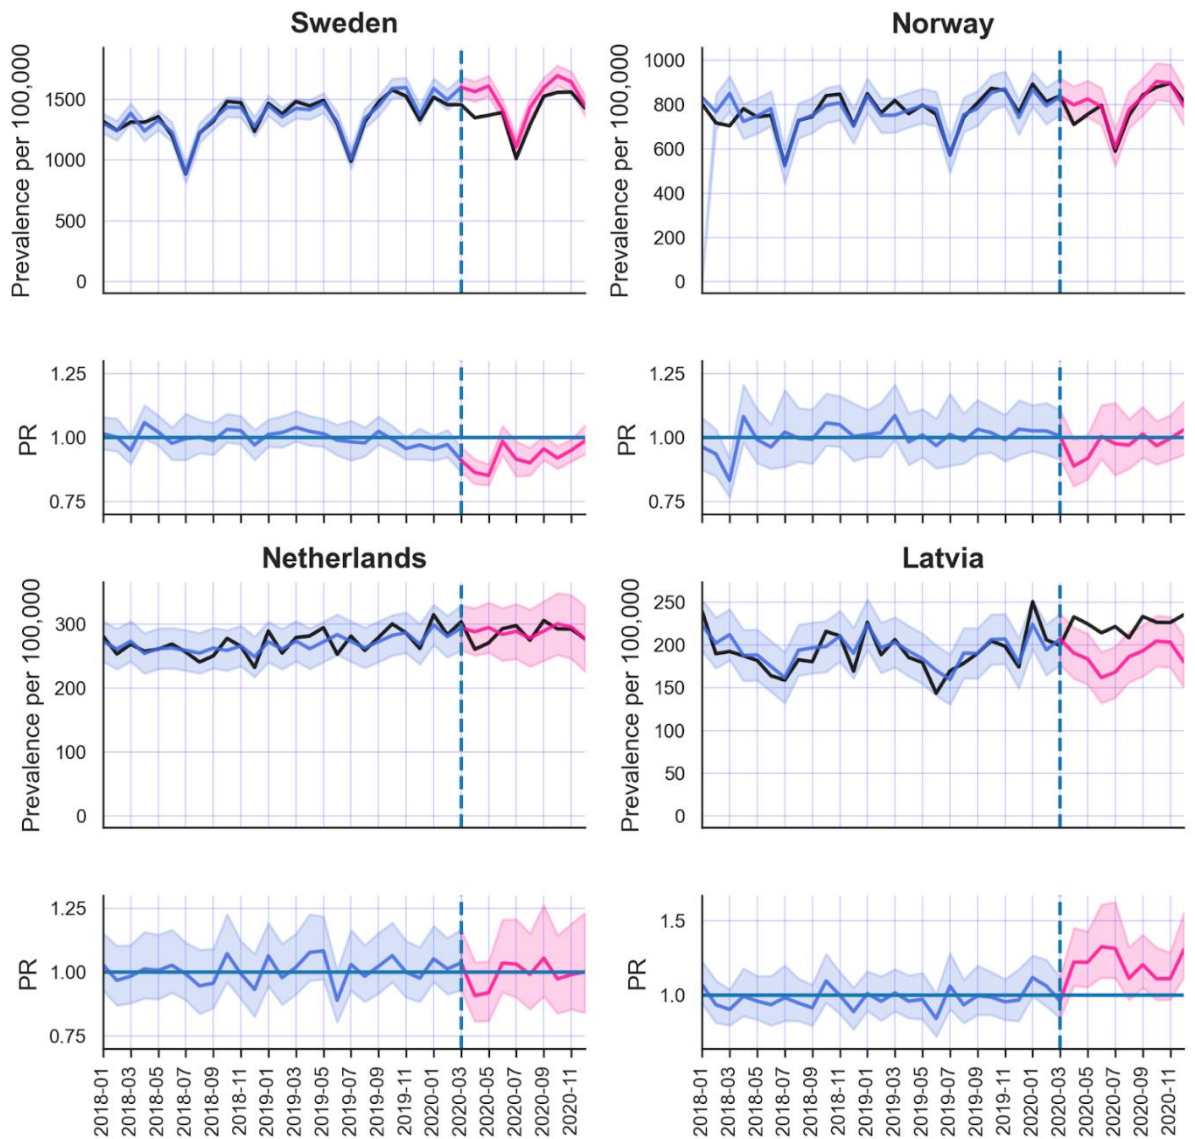

*Supplemental figure 1. Monthly counts of unique individuals with anxiety disorders.*

In 2019, the average monthly care prevalence in Sweden were 1400 individuals per 100 000 person-months, 780 per 100 000 person-months in Norway, 300 per 100 000 person-month in the Netherlands, and 200 per 100 000 person-month in Latvia.
