# Supplementary material for: Differential impact of the COVID-19 pandemic on primary care utilization related to common mental disorders in four European countries: A retrospective observational study
Source: PubMed Central journal article supplement (PMC9868724; doi:10.3389/fpsyt.2022.1045325), 2023-01-09
Supplement: Image_2.pdf [file Image_2.pdf]

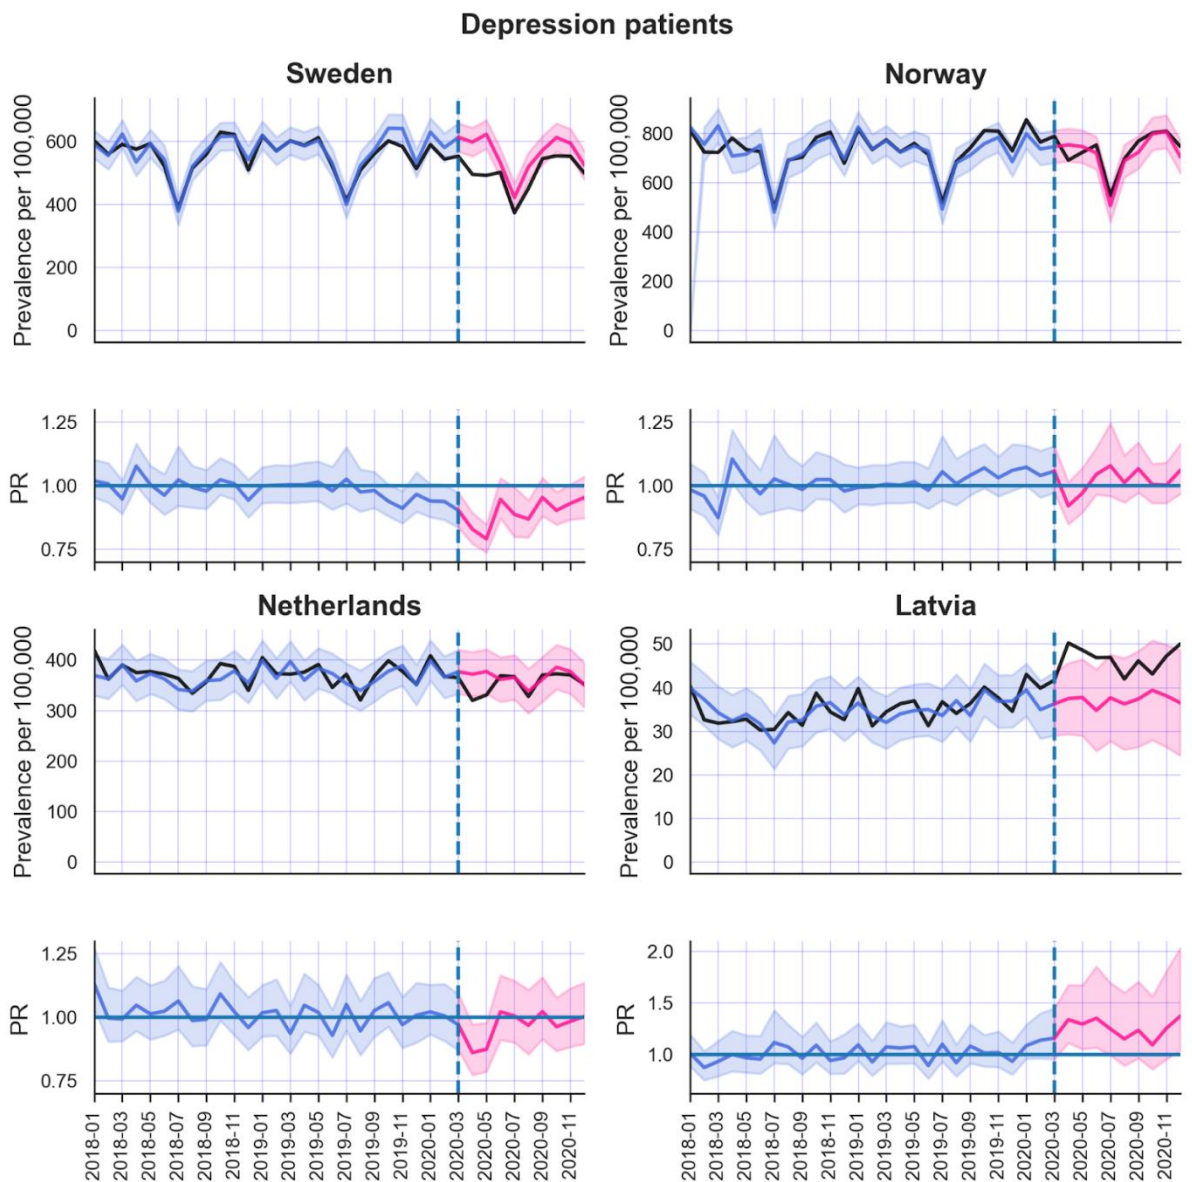

**Supplemental figure 2. Monthly counts of unique individuals with depressive disorders.**

Prevalence of depression prior to the pandemic varied from approximately 40 per 100 000 person-months in Latvia, to 750 per 100 000 person-months in Norway. The rates in Sweden and Netherlands were 500 and 350 per 100 000 person-months, respectively.
