# Supplementary material for: Differential impact of the COVID-19 pandemic on primary care utilization related to common mental disorders in four European countries: A retrospective observational study
Source: PubMed Central journal article supplement (PMC9868724; doi:10.3389/fpsyt.2022.1045325), 2023-01-09
Supplement: Image_4.pdf [file Image_4.pdf]

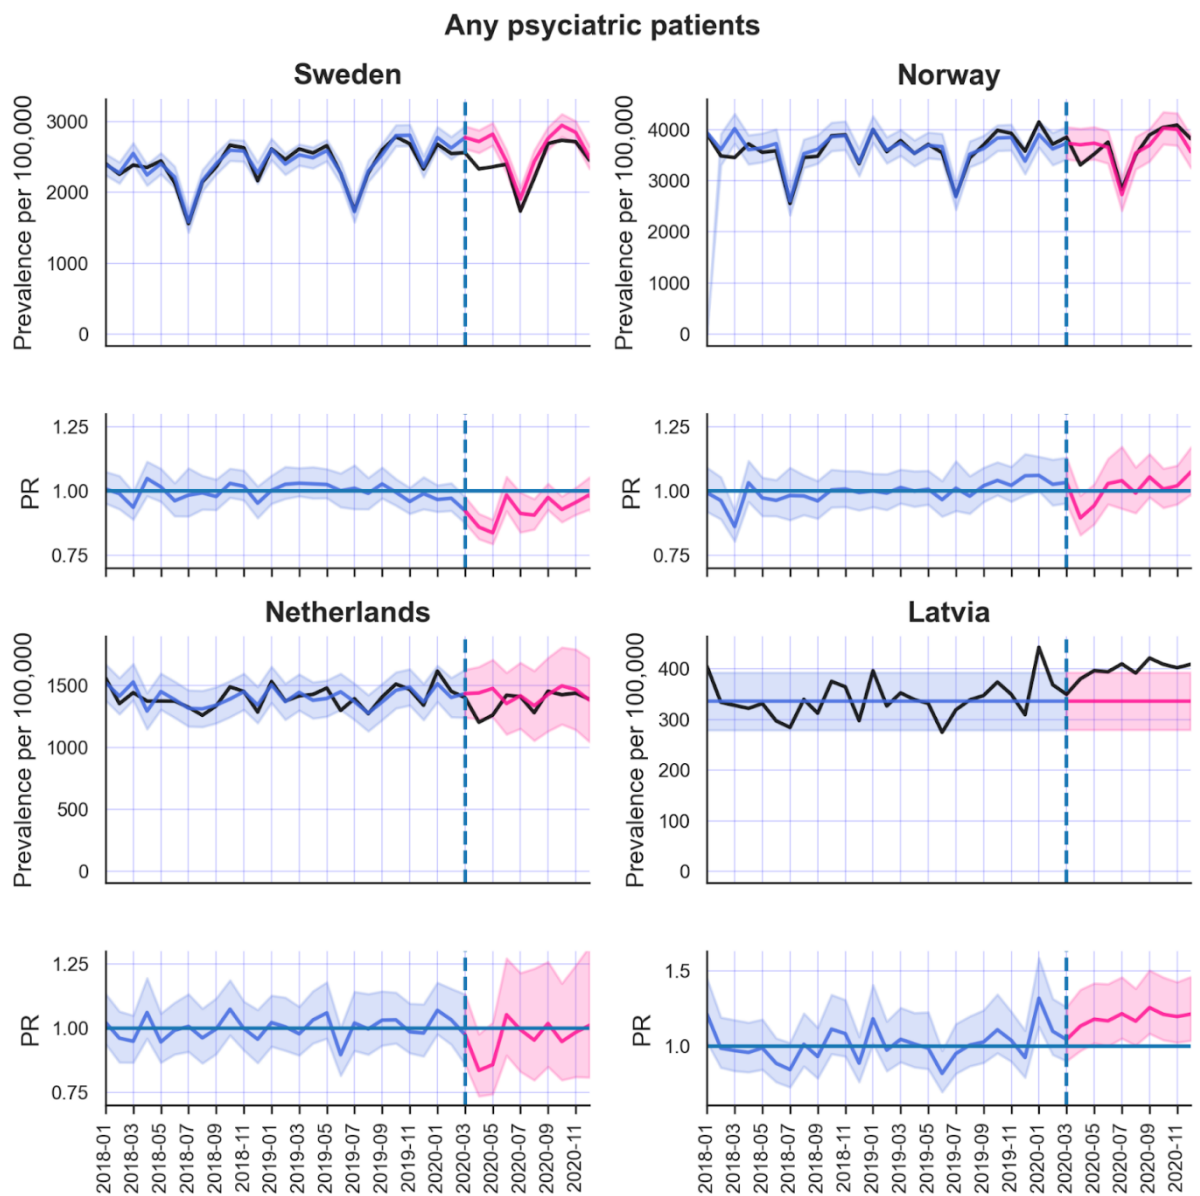

**Supplemental figure 4. Monthly counts of unique patients with any psychiatric diagnosis in primary care.**

Note, modeling of Latvian time series did not work well using SARIMA modeling for current time series, likely due to highly irregular and non seasonal data. .
