# Supplementary material for: Differential impact of the COVID-19 pandemic on primary care utilization related to common mental disorders in four European countries: A retrospective observational study
Source: PubMed Central journal article supplement (PMC9868724; doi:10.3389/fpsyt.2022.1045325), 2023-01-09
Supplement: Image_5.pdf [file Image_5.pdf]

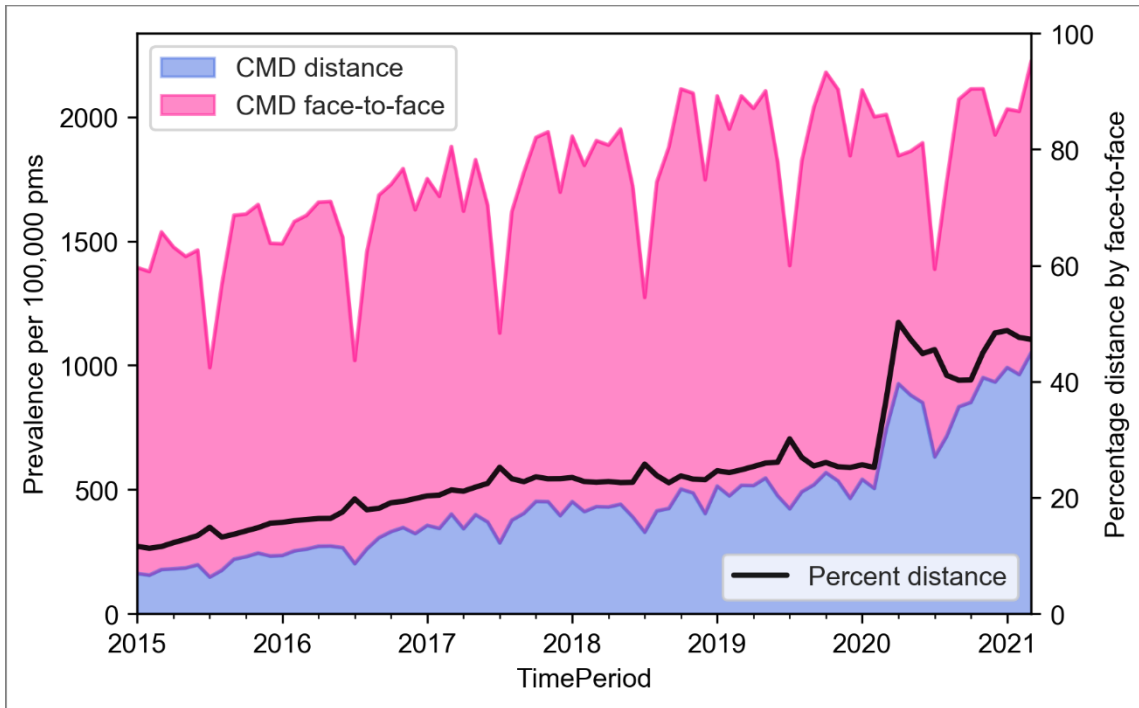

**Supplemental figure 5.** Changes in proportions of distance vs face-to-face CMD consultations in Sweden.

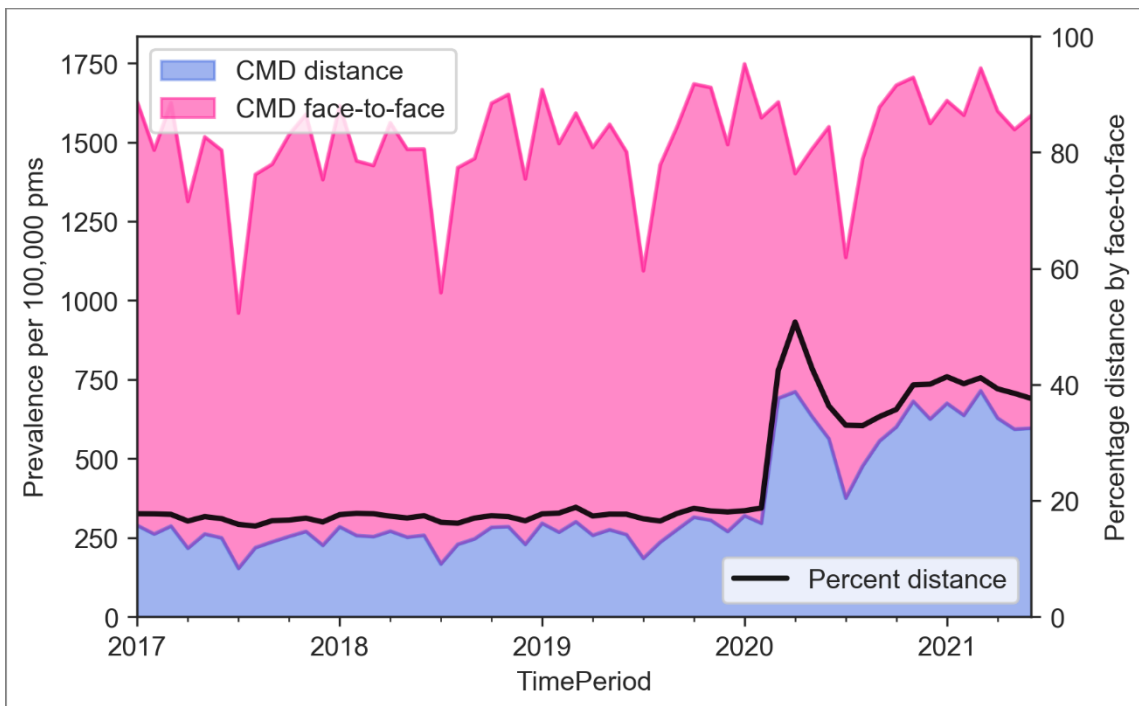

**Supplemental figure 6.** Changes in proportions of distance vs face-to-face CMD consultations in Norway.
